# Supplementary material
Source: publisher site journal article supplement (https://www.dovepress.com/get_supplementary_file.php?f=360129.docx)
Supplement: Supplementary file 1 [file get_supplementary_file.php]

**Supplementary Figure 1** Mice were injected with AAV9-TnT-si-NC as control or AAV9-TnT-si-circFbxl5 through tail vein, and the efficiency of adenovirus transduction was quantified based on GFP positive cells (a: representative immunofluorescent image; b: quantitative analysis); ns = not significant vs si-NC, n = 4 per group.
